# Supplementary figures and images for: Pan-Cancer Analysis and Validation of NT5DC2: Emphasizing Its Prognostic Significance and Immunological Role in TNBC
Source: Research Square preprint supplement (doi:10.21203/rs.3.rs-6212403/v1), 2025-03-31

WB：

Cells: MDM-MB-468

Repeat1 Repeat2 Repeat3

130

100


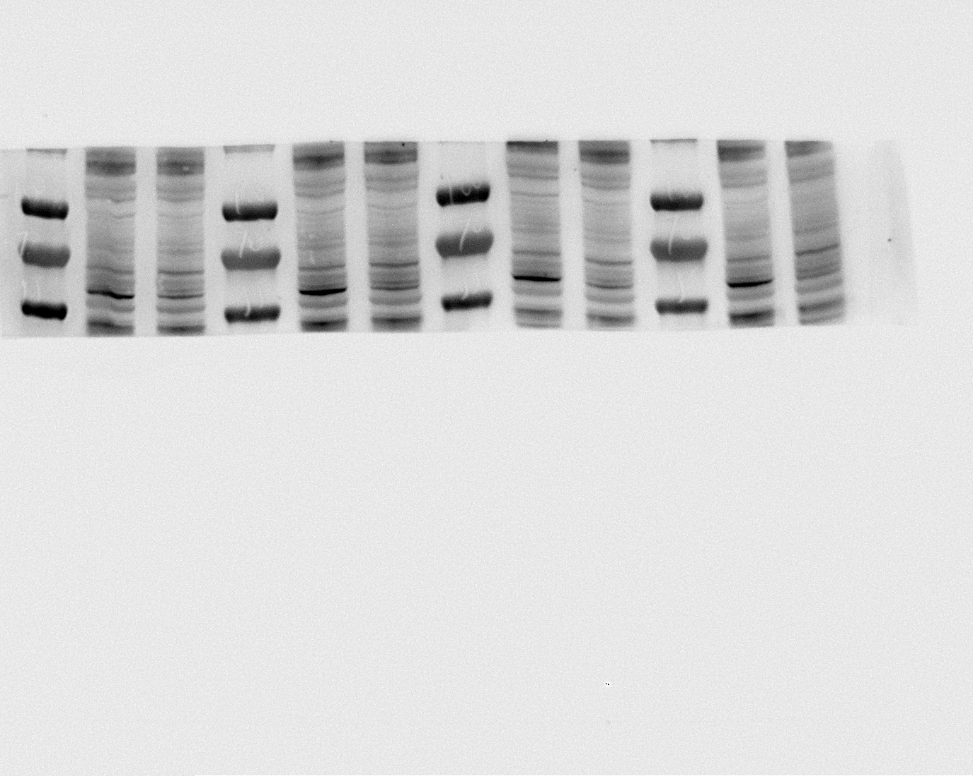

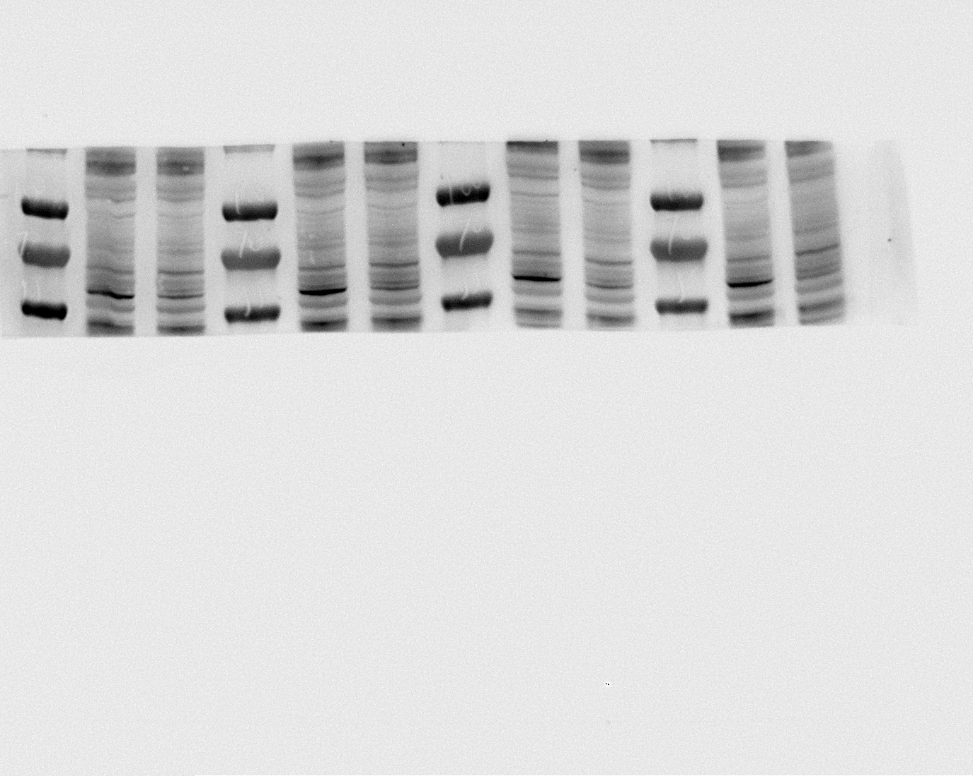

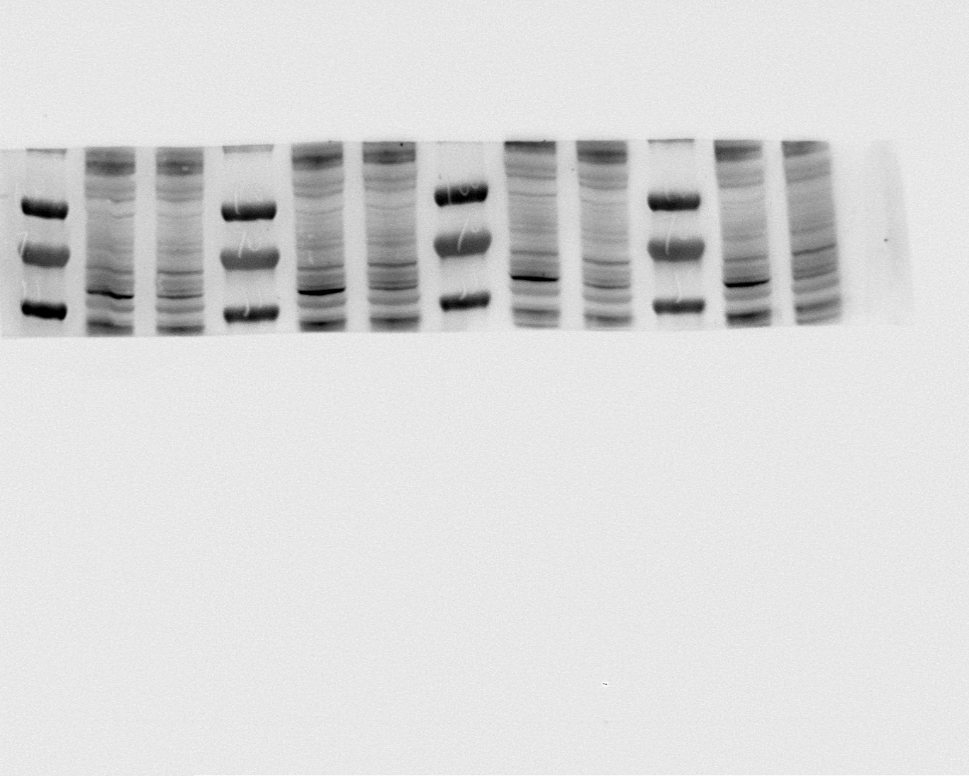
 NT5DC2 65kDa

70

55


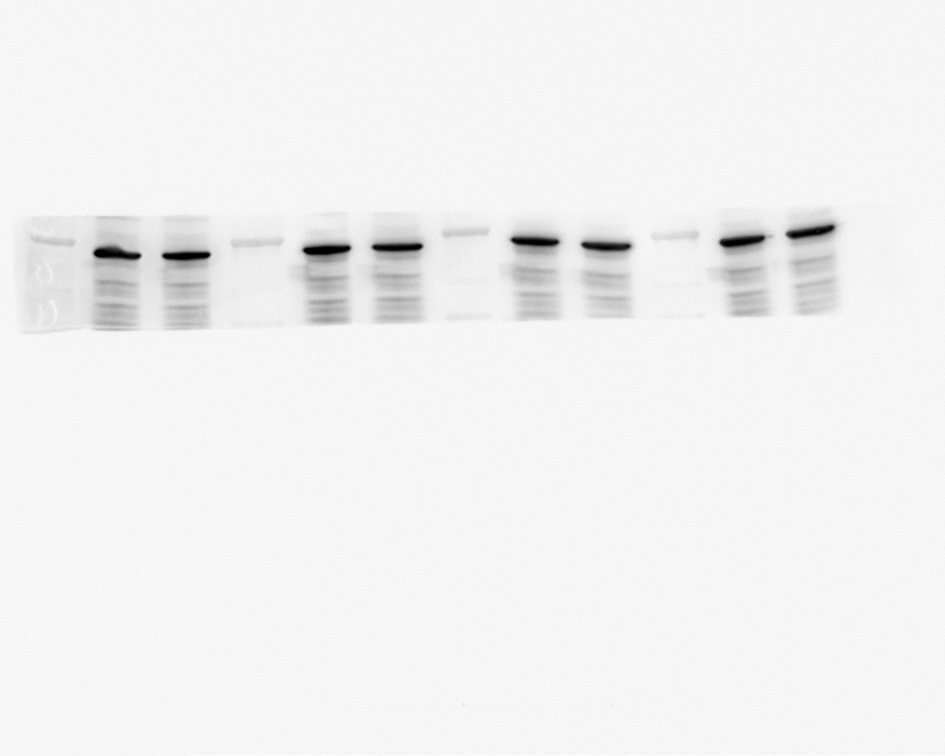
 GAPDH 37kDa

40

Invitrogen NT5DC2 (PA5-42853)

Supplement: Supplementary file 1 [file cadf1d1f4506ddac7d30a775.docx]
